# Supplementary material for: RedoxiFluor: A microplate assay to quantify protein thiol redox state in percentages and moles
Source: Research Square preprint supplement (doi:10.21203/rs.3.rs-847650/v1), 2021-08-26
Supplement: Supplementary file 1 [file affe085d1aee499fb53fed82.docx]

**Supplement.**


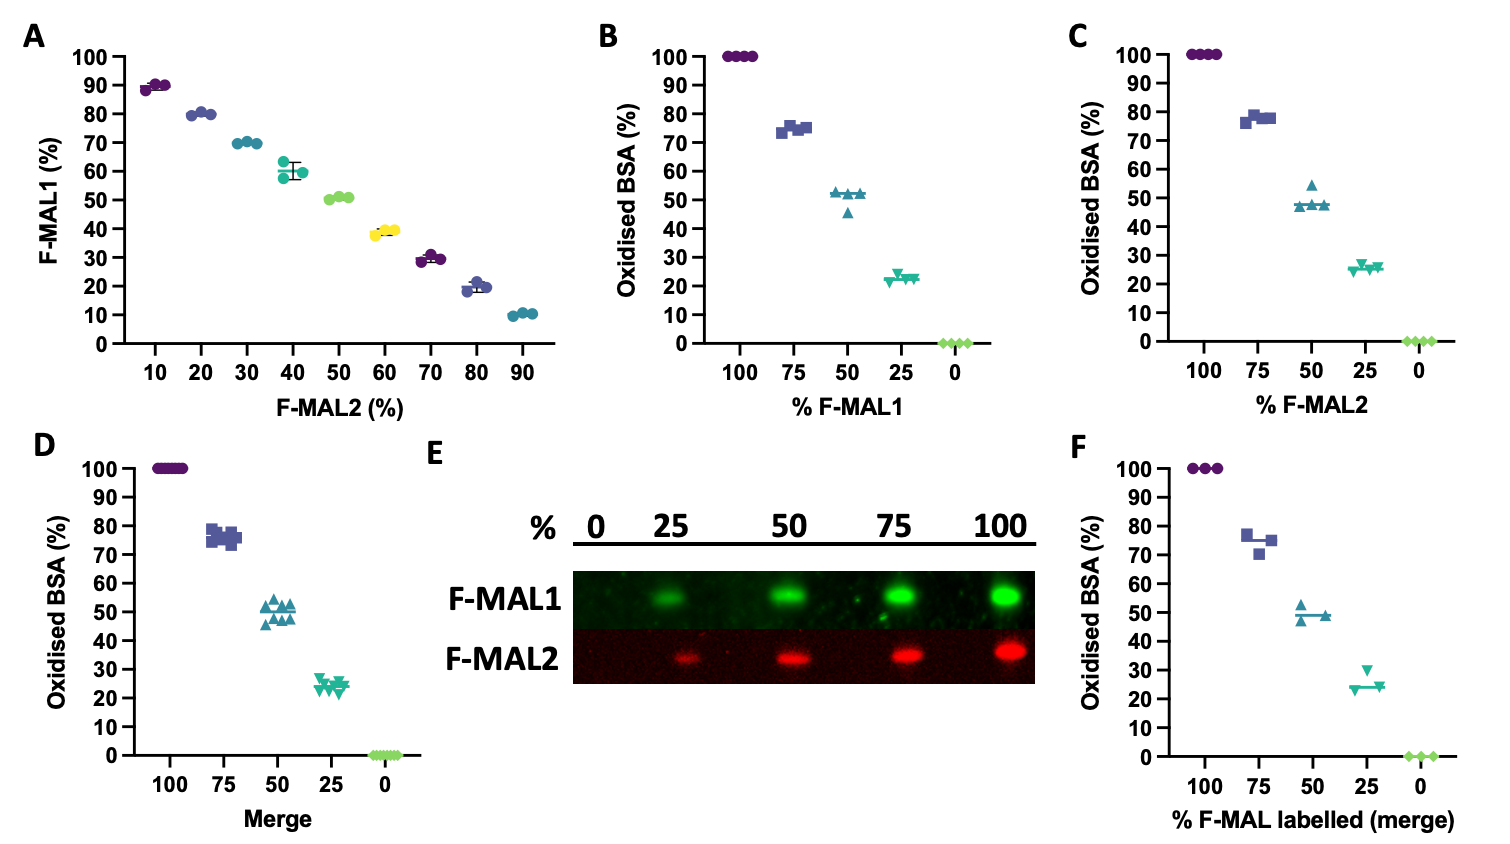


**Supplementary Figure 1. Proof-of-principle RedoxiFluor experiments. A. RedoxiFluor can discern between 10 to 90% reversibly oxidised redox states obtained by mixing equimolar amounts of F-MAL1 and F-MAL2 (i.e., a protein free system) in a plate reader. RedoxiFluor can discern between different redox states of a recombinant protein (i.e., bovine serum albumin, BSA, D) in a plate reader regardless of whether F-MAL1 (B) or 2 (C) is used first. States were obtained by mixing fully labelled F-MAL1 and 2 BSA standards as appropriate to a final concentration of 1 ug (see methods). Representative image (E) and quantification data (F) showing that RedoxiFluor can discern between different BSA redox states in a gel following SDS-PAGE.**

**
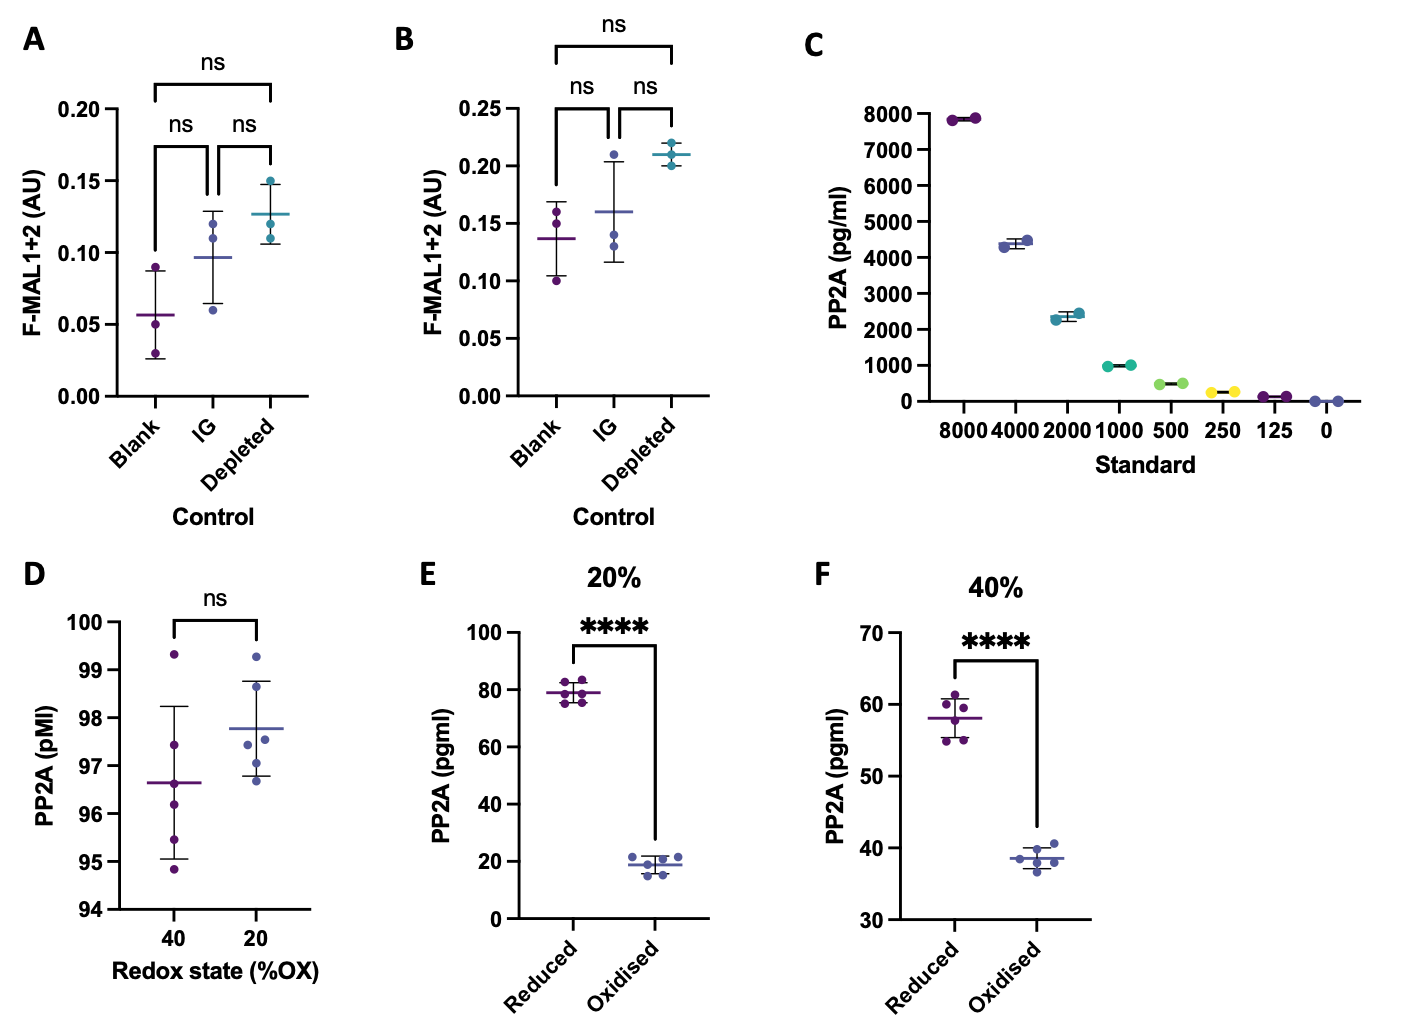
**

**Supplementary Figure 2. RedoxiFluor controls and extended data. Protein A (A) and ELISA (B) mode RedoxiFluor controls showing no significant difference (*P* > 0.05) in summed F-MAL1-2 signal in rabbit immunoglobin (IG, *n* = 3) and PP2A immunodepleted (*n* = 3) controls compared to blank wells (*n* = 3) as determined by a one-way ANOVA. C. A representative ELISA mode recombinant mouse PP2A standard curve (range 8,000 to 125 PP2A pg/ml). D. No significant (unpaired t-test, *P* = 0.172, *n* = 6) difference in PP2A protein content between the 40 and 20% reversibly oxidised standards. Significant differences (paired-tests, *P* = < 0.0001 in panel E-F, *n* = 6) in the amount of reduced compared to reversibly oxidised PP2A in the 20 (panel E) and 40% (panel F) reversibly oxidised standards.**

**
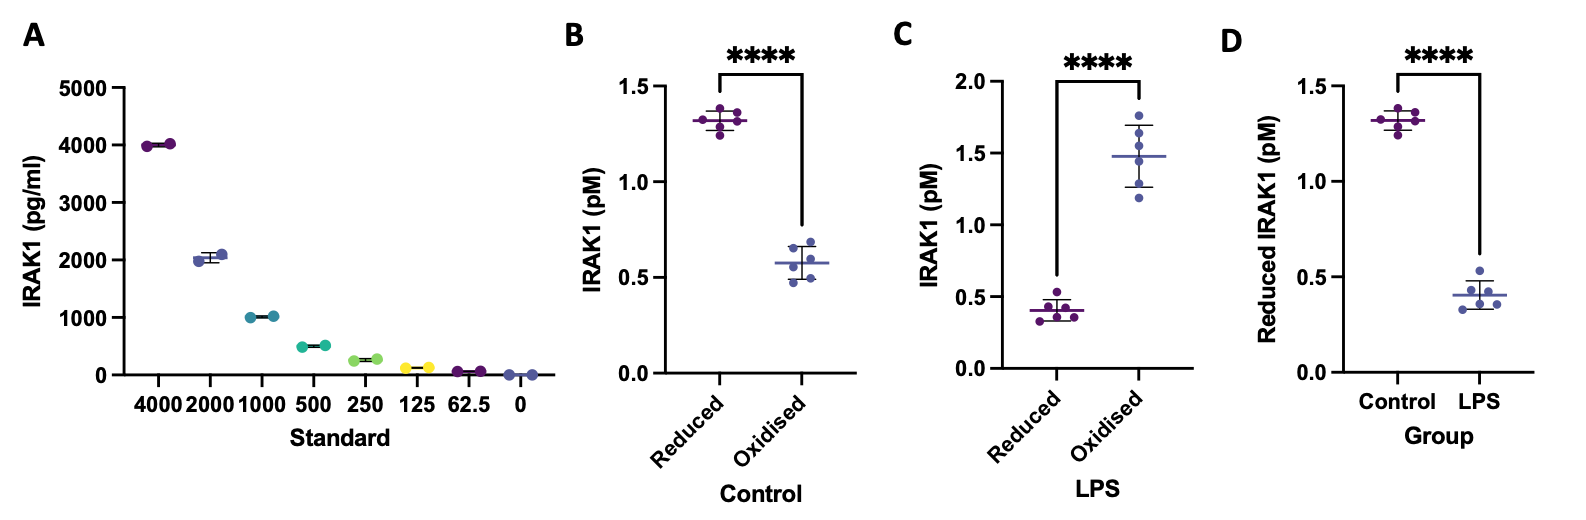
**

**Supplementary Figure 3. Redox immunology part 1. LPS increases IRAK1 oxidation extended data. A. A representative ELISA mode recombinant human IRAK1 standard curve (range 4,000 to 62.5 IRAK1 pg/ml). B. In ELISA mode, picomoles of reduced IRAK1 are significantly (paired t-test, < 0.0001, *n* = 6) greater than picomoles of oxidised IRAK1 in unstimulated human monocytes. C. In ELISA mode, picomoles of oxidised IRAK1 are significantly (paired t-test, < 0.0001, *n* = 6) greater than picomoles of reduced IRAK1 in LPS stimulated human monocytes D. A significant (unpaired t-test, *P* = < 0.0001, *n* = 6) LPS induced decrease in picomoles of reduced IRAK1 in LPS stimulated compared to unstimulated human monocytes.**

**
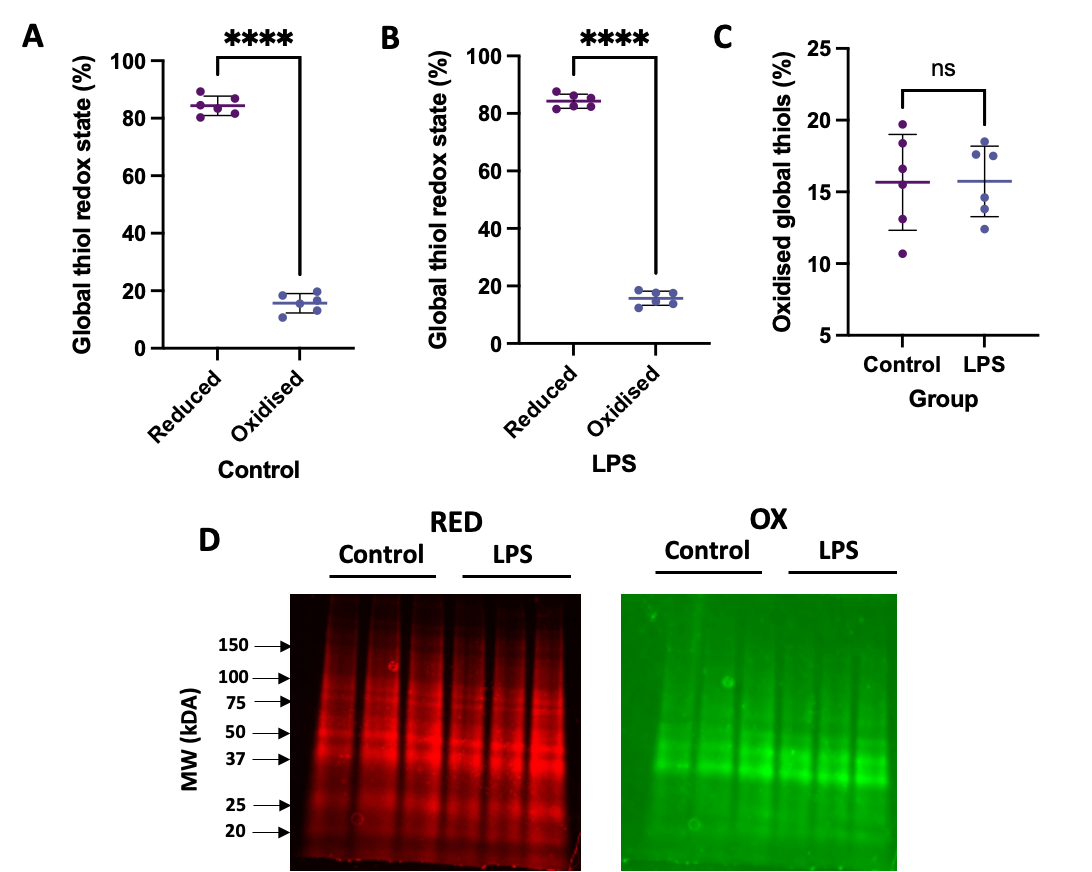
**

**Supplementary Figure 4. No difference in the redox state of the bulk thiol proteome in unstimulated (control) and LPS stimulated human monocytes. Significant differences (paired t-tests, *P* = < 0.0001 in panels A-B, *n* = 6) in percent reduced compared to percent oxidised protein in unstimulated (control, panel A) and LPS stimulated (panel B) human monocytes. C. No significant difference (unpaired t-test, *P* = 0.9694, *n* = 6) in percent reversibly oxidised protein in LPS stimulated compared to unstimulated human monocytes. D. A representative SDS-PAGE gel image confirming that both proteomes are highly reduced and showing the similarity in band patterns in the reduced (red channel, F-MAL1) and reversibly oxidised (green channel, F-MAL2) between the control and LPS groups.**


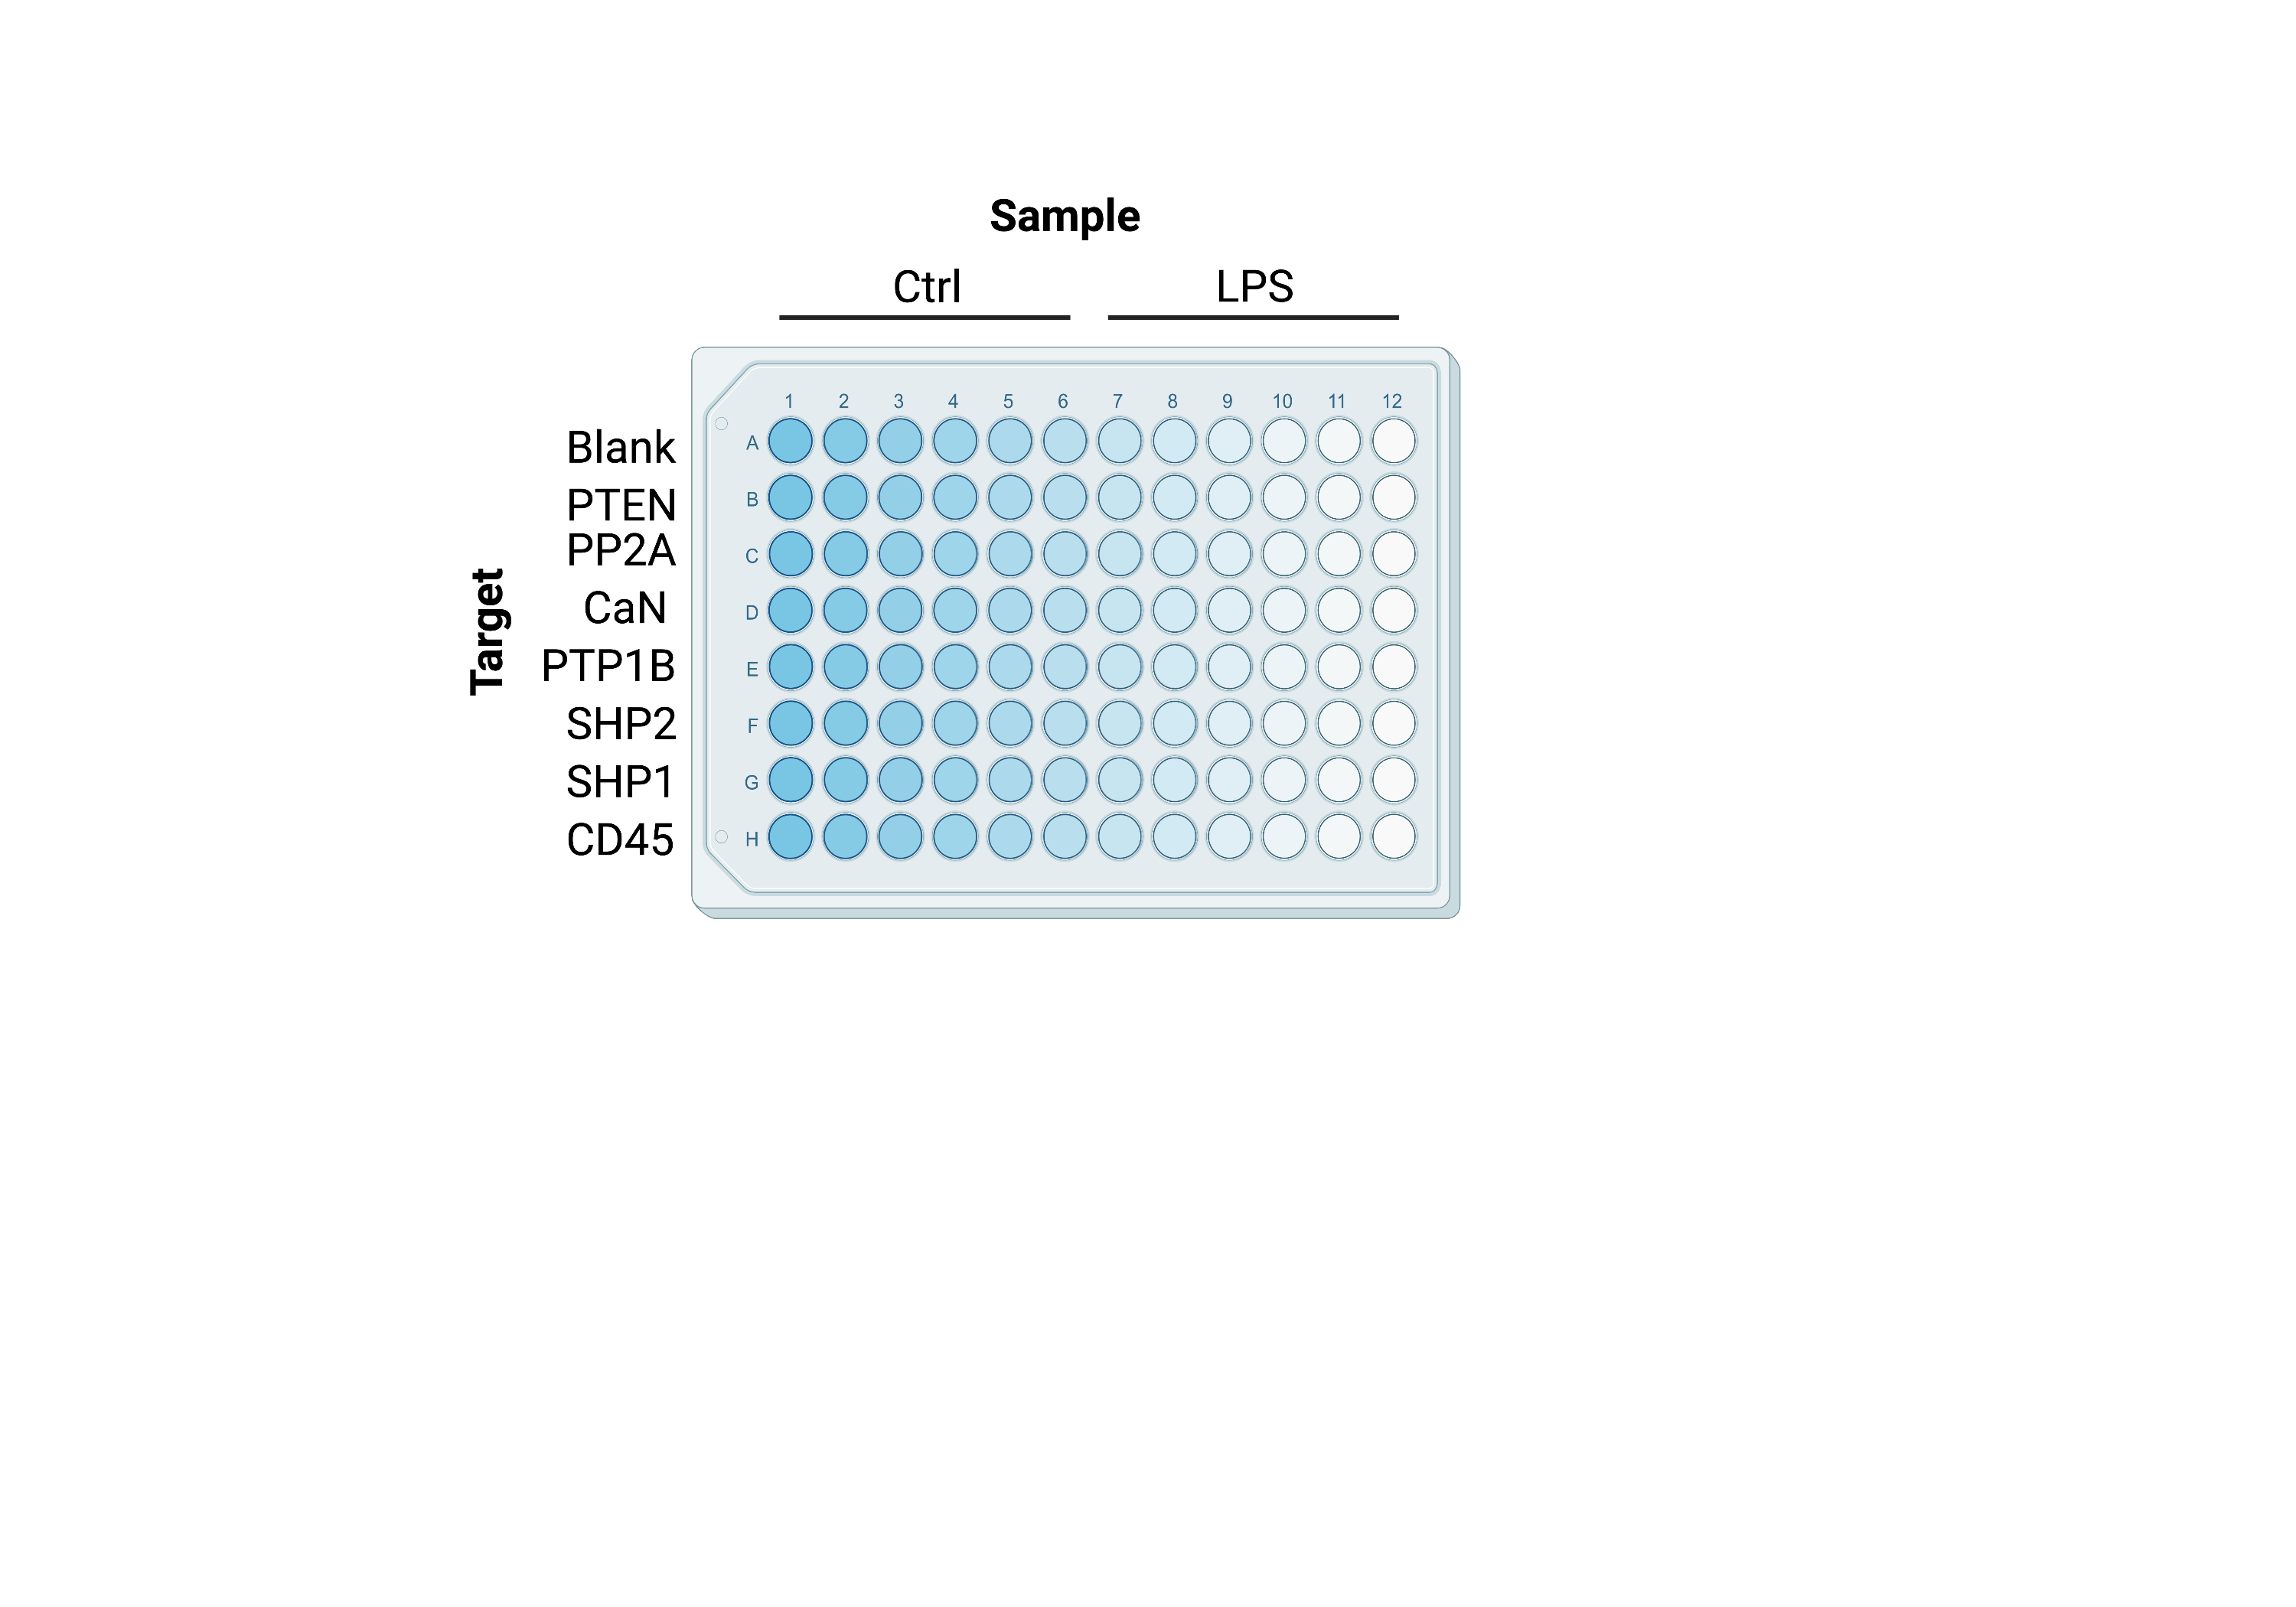


**Supplementary Figure 5. Selected array mode RedoxiFluor protein A microplate layout by sample (1-2) state (control: 1-6, LPS: 7-12) and protein phosphatase (rows B-H).**

**Supplementary Figure 6. Array mode RedoxiFluor extended data: redox state of the seven protein phosphatases in unstimulated human macrophages. Percentage reduced protein is significantly greater (paired t-tests, all *P* valuesare < 0.0001, *n* = 6) than percent reversibly oxidised protein for all of the measured protein phosphatases as determined by array mode RedoxiFluor in unstimulated human monocytes.**

**Supplementary Figure 7. Array mode RedoxiFluor extended data: redox state of the seven protein phosphatases in LPS stimulated human macrophages. Percentage reduced protein is significantly greater (paired t-tests, aside from CD45 [*P* = 0.0002) all *P* valuesare < 0.0001, *n* = 6) than percent reversibly oxidised protein for all of the measured protein phosphatases as determined by array mode RedoxiFluor in LPS stimulated human monocytes.**

**
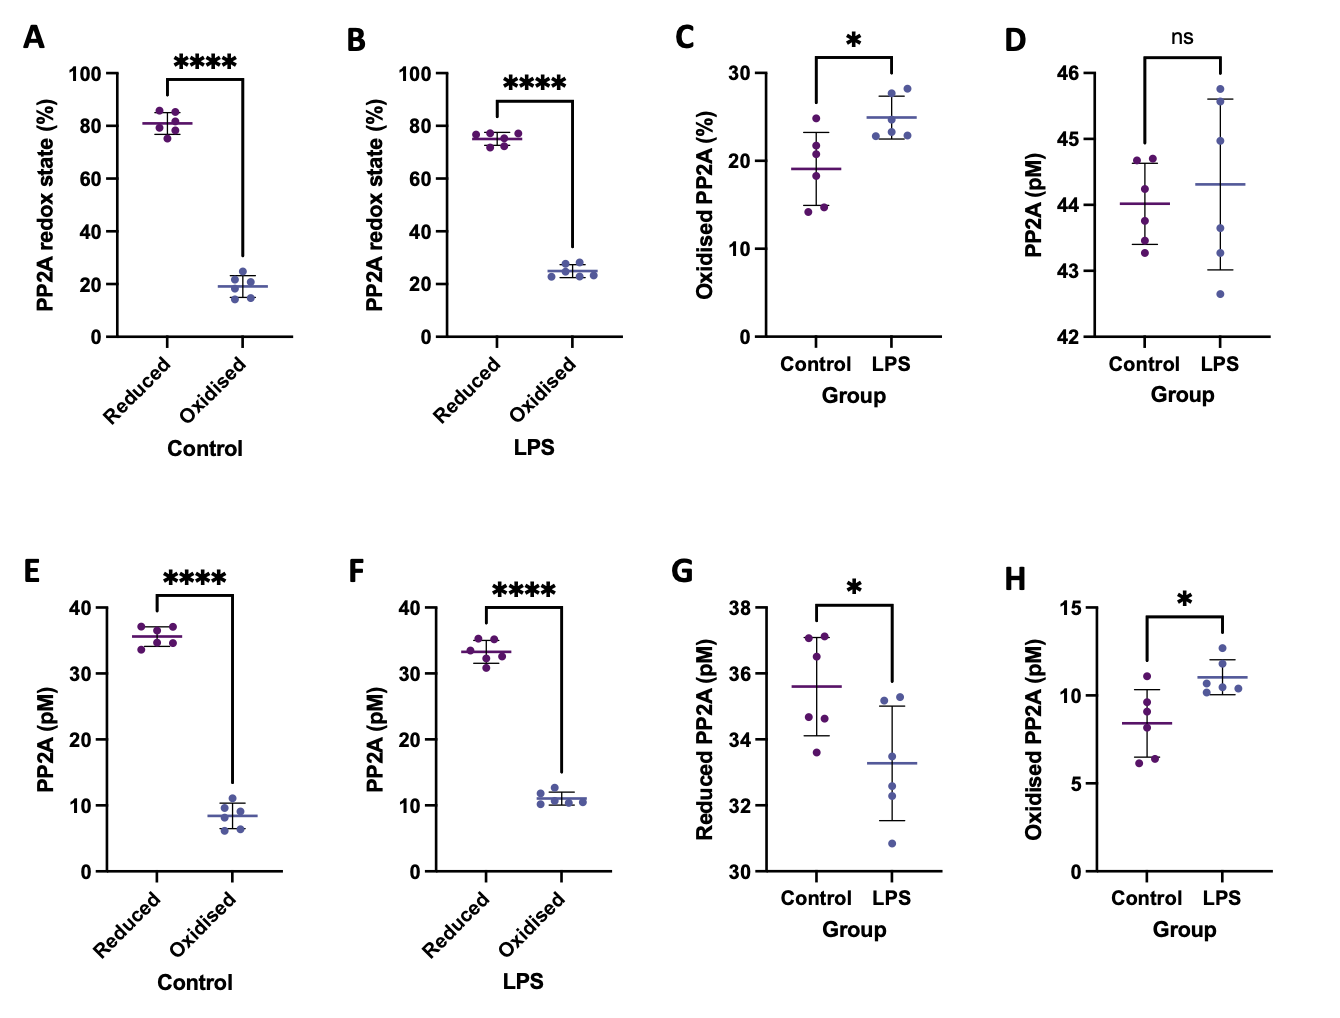
**

**Supplementary Figure 8. ELISA mode RedoxiFluor reveals a significant LPS induced increased in PP2A specific reversible thiol oxidation. Significant differences (paired t-tests, *P* = < 0.0001 in panels A-B, *n* = 6) in percent reduced compared to percent oxidised PP2A in unstimulated (control, panel A) and LPS stimulated (panel B) human monocytes. C. A significant (unpaired t-test, *P* = 0.0140, *n* = 6) LPS induced increase in PTEN specific reversible thiol oxidation in stimulated compared to unstimulated human monocytes. D. No significant (unpaired t-test, *P* = 0.6278, *n* = 6) difference in picomoles of PP2A in LPS stimulated compared to unstimulated human monocytes. Significant differences (paired t-tests, *P* = < 0.0001 in panels E-F, *n* = 6) in picomoles of reduced compared to oxidised PP2A in unstimulated (control, panel A) and LPS stimulated (panel B) human monocytes. G. A significant (unpaired t-test, *P* = 0.0319, *n* = 6) decrease in picomoles of reduced PP2A in LPS stimulated compared to unstimulated human monocytes. H. A corresponding significant (unpaired t-test, *P* = 0.0140, *n* = 6) increase in picomoles of reduced PP2A in LPS stimulated compared to unstimulated human monocytes.**

**
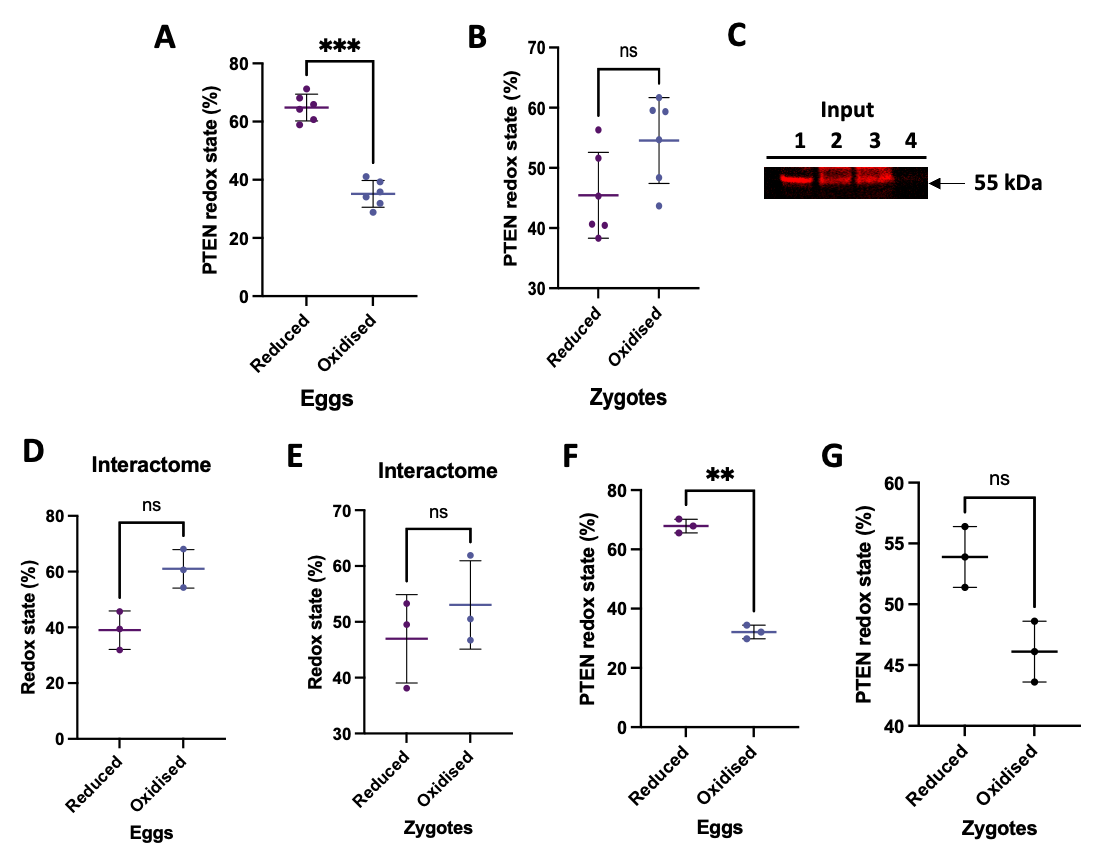
**

**Supplementary Figure 9. Fertilisation increases PTEN specific reversible thiol oxidation extended data. A. A significant difference (paired t-test, *P* = 0.0005, *n* = 6) in percent reduced compared to percent oxidised PTEN in unfertilised *X. laevis* eggs as determined by protein A mode RedoxiFluor. B. No significant difference (paired t-test, *P* = 0.1796, *n* = 6) in percent reduced compared to percent oxidised PTEN in 1-cell *X. laevis* zygotes as determined by protein A mode RedoxiFluor. C. An immunoblot image showing successful PTEN immunoprecipitation (IP) in unfertilised eggs (lane 2) and 1-cell zygotes (lane 3). No PTEN was eluted in the rabbit IG control (lane 4). Lane 1 is a *X. laevis* lysate (i.e., no IP) control. D. Macroscale RedoxiFluor reveals no significant (unpaired t-tests, n = 3) in PTEN interactome redox state in unfertilised eggs (panel D, *P* = 0.1102) and 1-cell zygotes (panel E, *P* = 0.5749). F. A. A significant difference (paired t-test, *P* = 0.0055, *n* = 3) in percent reduced compared to percent oxidised PTEN in unfertilised *X. laevis* eggs as determined by macroscale RedoxiFluor. B. No significant difference (paired t-test, *P* = 0.1140, *n* = 3) in percent reduced compared to percent oxidised PTEN in 1-cell *X. laevis* zygotes as determined by macroscale RedoxiFluor.**

**Supplementary Table 1. Redox regulated phosphatases selected for array mode RedoxiFluor. MW denotes molecular weight.**

| **Phosphatase** | **Uniport ID** | **Type** | **MW (kDa)** | **Thiols (#)** | **Catalytic thiol (residue)** |
| --- | --- | --- | --- | --- | --- |
| **PTEN** | P60484 | Lipid, Ser/Ther, Tyrosine | 47.1 | 10 | Yes (Cys124) |
| **PP2A** | P67775 | Ser/Ther | 35.6 | 10 | No |
| **Calcineurin** | P48454 | Ser/Ther | 58.1 | 12 | No |
| **SHP-1** | P29350 | Tyrosine | 67.5 | 7 | Yes (Cys453) |
| **SHP-2** | Q06124 | Tyrosine | 68 | 11 | Yes (Cys459) |
| **PTP1B** | P18031 | Tyrosine | 50 | 10 | Yes (Cys215) |
| **CD45** | P08575 | Tyrosine | 147.6 | 26 | Yes (Cys853) |
| **Range** | **n/a** | **Lipid to all protein types** | **35.6 to 147.6** | **7-26** | **Yes and No** |
